# Supplementary material
Source: publisher figshare collection journal article supplement (https://tandf.figshare.com/ndownloader/files/14079818)

## SUPPLEMENTARY MATERIAL

### Three new dibenzofurans from *Cydonia oblonga* Mill.

Jiao-Jiao Wei<sup>a,b</sup>, Wen-Qiong Wang<sup>a</sup>, Wei-Bin Song<sup>a</sup>, and Li-jiang Xuan<sup>a\*</sup>

<sup>a</sup> *State Key Laboratory of Drug Research, Shanghai Institute of Materia Medica, Chinese Academy of Sciences, 501 Haik Road, Shanghai 201203, People's Republic of China*

<sup>b</sup> *University of Chinese Academy of Sciences, No.19A Yuquan Road, Beijing 100049, People's Republic of China*

\*Corresponding Author: E-mail: [ljxuan@sim.ac.cn](mailto:ljxuan@sim.ac.cn)

**Abstract:** Phytochemical investigation of *Cydonia oblonga* Mill. collected in Xinjiang province, China, led to the isolation and identification of three new dibenzofurans (**1-3**) along with one known compound (**4**). Their structures were elucidated based on HRESIMS, spectroscopic data (IR, UV, 1D, 2D NMR) and X-ray diffraction analysis.

**Key words:** *Cydonia oblonga* Mill.; dibenzofurans; Rosaceae

## List of content

Table S1.  $^1\text{H}$  NMR (400 MHz) and  $^{13}\text{C}$  NMR (100 MHz) data for Compounds **1-3** ( $\delta_{\text{H}}$ ,  $\delta_{\text{C}}$  in ppm,  $J$  in Hz)

Figure S1. Chemical structures of compounds **1-4**

Figure S2. Key COSY, HMBC and NOESY correlations of compound **1**

Figure S3. IR spectrum of compound **1**

Figure S4. HRESIMS spectrum of compound **1**

Figure S5.  $^1\text{H}$  NMR spectrum of compound **1** in acetone- $d_6$

Figure S6.  $^{13}\text{C}$  NMR spectrum of compound **1** in acetone- $d_6$

Figure S7. HSQC spectrum of compound **1** in acetone- $d_6$

Figure S8. HMBC spectrum of compound **1** in acetone- $d_6$

Figure S9. NOESY spectrum of compound **1** in acetone- $d_6$

Figure S10. Key COSY, HMBC and NOESY correlations of compound **2**

Figure S11. IR spectrum of compound **2**

Figure S12. HRESIMS spectrum of compound **2**

Figure S13.  $^1\text{H}$  NMR spectrum of compound **2** in acetone- $d_6$

Figure S14.  $^{13}\text{C}$  NMR spectrum of compound **2** in acetone- $d_6$

Figure S15. HSQC spectrum of compound **2** in acetone- $d_6$

Figure S16. HMBC spectrum of compound **2** in acetone- $d_6$

Figure S17. NOESY spectrum of compound **2** in acetone- $d_6$

Figure S18. X-ray ORTEP drawing of compound **2**

Figure S19. Key COSY, HMBC and NOESY correlations of compound **3**

Figure S20. IR spectrum of compound **3**

Figure S21. HRESIMS spectrum of compound **3**

Figure S22.  $^1\text{H}$  NMR spectrum of compound **3** in  $\text{CDCl}_3$

Figure S23.  $^{13}\text{C}$  NMR spectrum of compound **3** in  $\text{CDCl}_3$

Figure S24. HSQC spectrum of compound **3** in  $\text{CDCl}_3$

Figure S25. HMBC spectrum of compound **3** in  $\text{CDCl}_3$

Figure S26. NOESY spectrum of compound **3** in  $\text{CDCl}_3$

Figure S27. UV spectrum of compound **1**

Figure S28. UV spectrum of compound **2**

Figure S29. UV spectrum of compound **3**

**Table S1.**  $^1\text{H}$  NMR (400 MHz) and  $^{13}\text{C}$  NMR (100 MHz) data for compounds **1-3** ( $\delta_{\text{H}}$ ,  $\delta_{\text{C}}$  in ppm,  $J$  in Hz)

| position | <b>1<sup>a</sup></b> |                     | <b>2<sup>a</sup></b> |                     | <b>3<sup>b</sup></b> |                     |
|----------|----------------------|---------------------|----------------------|---------------------|----------------------|---------------------|
|          | $\delta_{\text{H}}$  | $\delta_{\text{C}}$ | $\delta_{\text{H}}$  | $\delta_{\text{C}}$ | $\delta_{\text{H}}$  | $\delta_{\text{C}}$ |
| 1        | 7.29 s               | 98.0                |                      | 141.2               | 7.23 s               | 97.4                |
| 2        |                      | 151.8               |                      | 137.3               |                      | 153.8               |
| 3        |                      | 141.6               |                      | 146.1               |                      | 143.3               |
| 4        |                      | 140.2               |                      | 132.6               |                      | 139.6               |
| 4a       |                      | 143.9               |                      | 146.3               |                      | 144.8               |
| 5a       |                      | 146.1               |                      | 145.5               |                      | 150.4               |
| 6        |                      | 133.4               |                      | 133.1               |                      | 170.5               |
| 7        |                      | 147.8               |                      | 147.5               |                      | 159.6               |
| 8        | 7.03 d (8.4)         | 109.4               | 7.02 d (8.3)         | 109.4               | 5.87 s               | 107.2               |
| 9        | 7.39 d (8.4)         | 110.7               | 7.49 d (8.3)         | 112.7               |                      | 183.3               |
| 9a       |                      | 120.8               |                      | 120.1               |                      | 123.3               |
| 9b       |                      | 121.2               |                      | 110.1               |                      | 118.7               |
| OMe-2    | 3.92 s               | 57.7                | 3.85 s               | 61.8                | 3.94 s               | 56.6                |
| OMe-3    | 3.85 s               | 61.7                | 3.96 s               | 61.8                | 3.95 s               | 61.8                |
| OMe-4    | 4.16 s               | 61.5                | 4.04 s               | 61.6                | 4.21 s               | 61.4                |
| OMe-7    | 3.92 s               | 57.1                | 3.92 s               | 57.4                | 3.89 s               | 57.1                |
| OH-1     |                      |                     | 8.48 br s            |                     |                      |                     |
| OH-6     | 8.25 br s            |                     | 8.26 br s            |                     |                      |                     |

<sup>a</sup> Recorded in acetone- $d_6$ . <sup>b</sup> Recorded in  $\text{CDCl}_3$ .

Figure S1. Chemical structures of compounds **1-4**

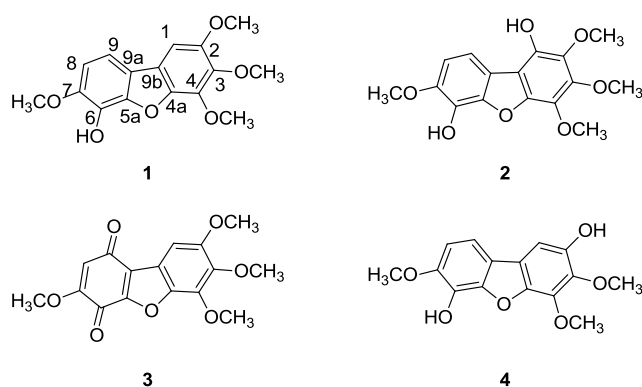

Figure S2. Key COSY, HMBC and NOESY correlations of compound **1**

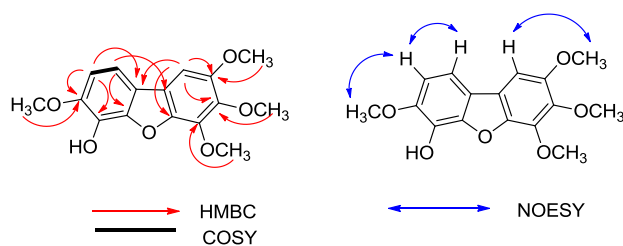

Figure S3. IR spectrum of compound **1**

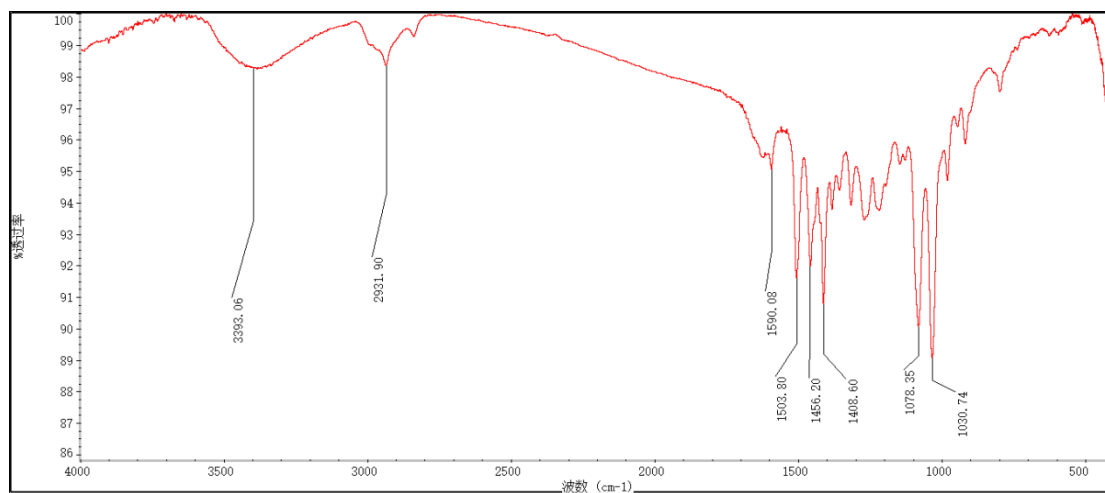

Figure S4. HRESIMS spectrum of compound **1**

#### User Spectra

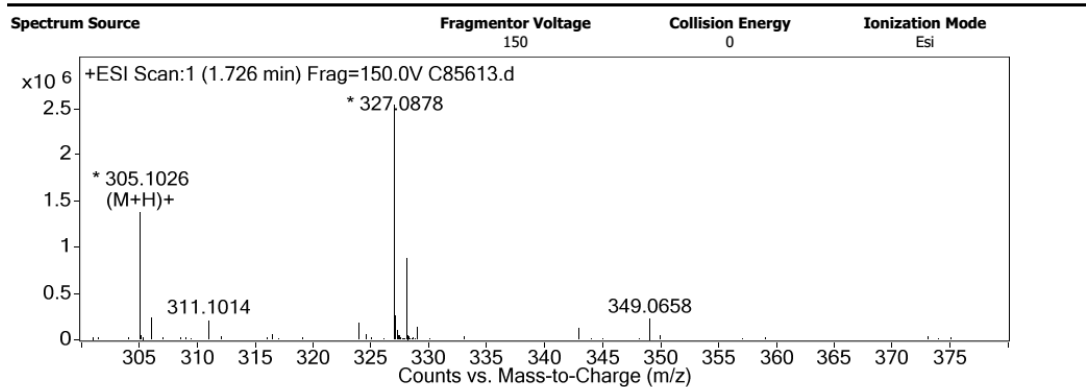

#### Peak List

| m/z      | z | Abund   | Name | Formula    | Ion                | Score (DB) | Hits (DB) |
|----------|---|---------|------|------------|--------------------|------------|-----------|
| 271.1304 |   | 319405  |      |            |                    |            |           |
| 305.1026 | 1 | 1367945 |      | C16 H17 O6 | (M+H) <sup>+</sup> |            |           |
| 327.0878 | 1 | 2539054 |      |            |                    |            |           |
| 328.0878 | 1 | 882112  |      |            |                    |            |           |
| 389.0549 |   | 321253  |      |            |                    |            |           |
| 476.1233 | 2 | 566862  |      |            |                    |            |           |
| 631.1877 |   | 2542311 |      |            |                    |            |           |
| 632.1837 | 1 | 2179514 |      |            |                    |            |           |
| 633.184  | 1 | 688974  |      |            |                    |            |           |
| 653.1611 | 1 | 860665  |      |            |                    |            |           |

#### Formula Calculator Element Limits

| Element | Min | Max |
|---------|-----|-----|
| C       | 3   | 40  |
| H       | 0   | 80  |
| O       | 0   | 20  |
| N       | 0   | 0   |
| S       | 0   | 0   |
| Cl      | 0   | 0   |
| F       | 0   | 0   |

#### Formula Calculator Results

| Formula    | Best | Mass     | Tgt Mass | Diff (ppm) | Ion Species | Score |
|------------|------|----------|----------|------------|-------------|-------|
| C16 H16 O6 | TRUE | 304.0954 | 304.0947 | -2.2       | C16 H17 O6  | 97.08 |

Figure S5.  $^1\text{H}$  NMR spectrum of compound **1** in acetone- $d_6$

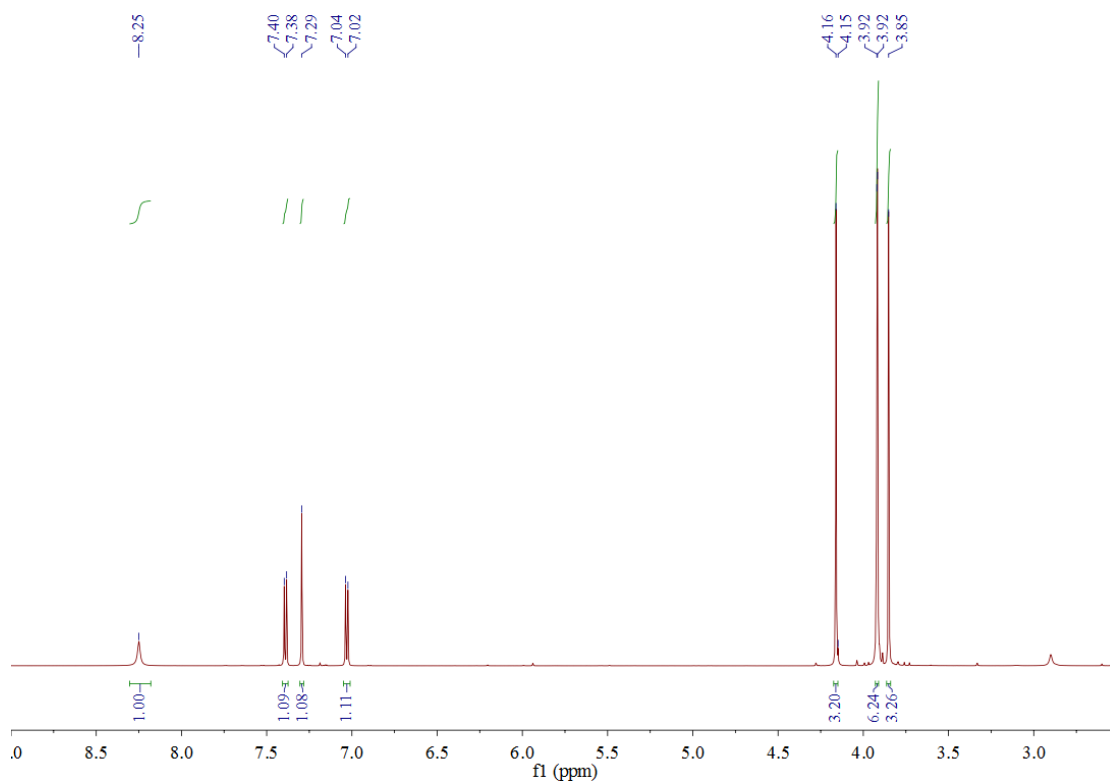

Figure S6.  $^{13}\text{C}$  NMR spectrum of compound **1** in acetone- $d_6$

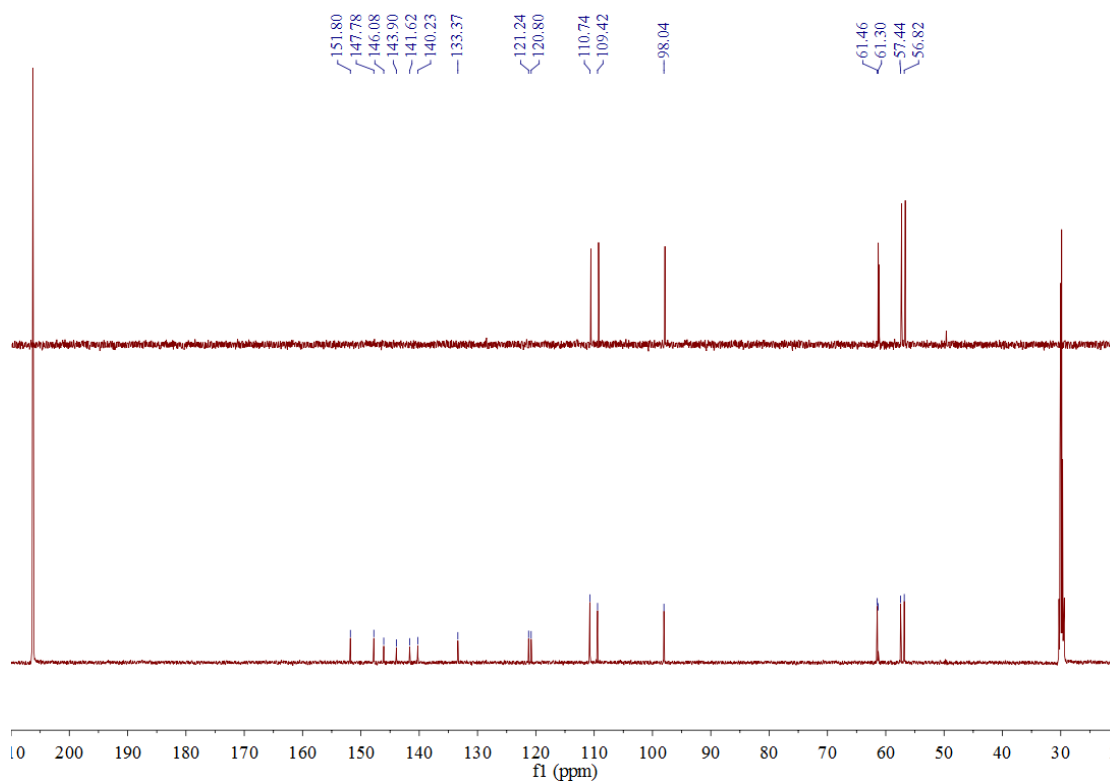

Figure S7. HSQC spectrum of compound **1** in acetone- $d_6$

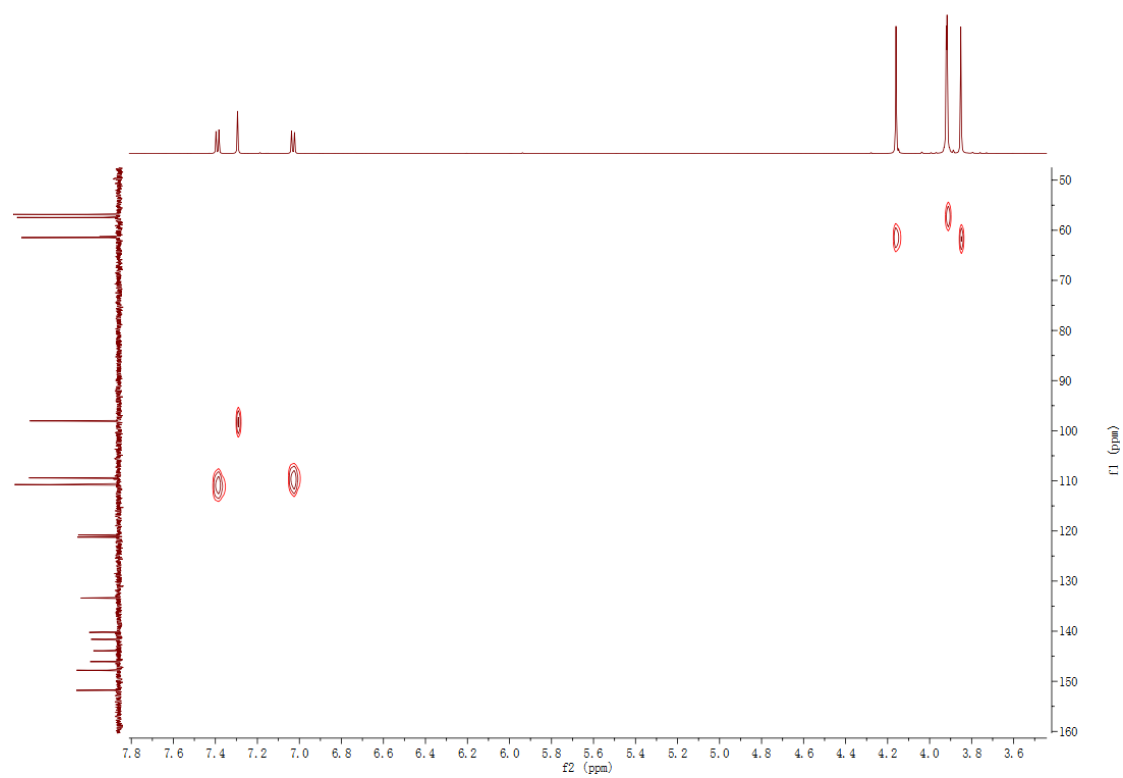

Figure S8. HMBC spectrum of compound **1** in acetone- $d_6$

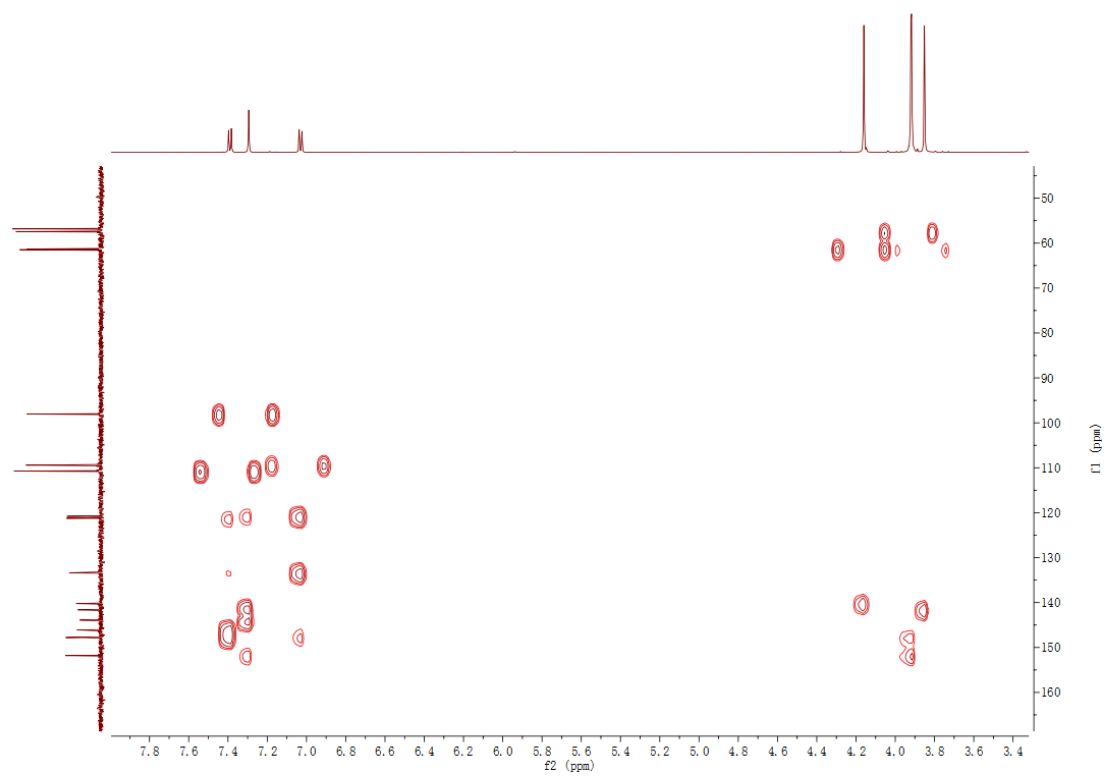

Figure S9. NOESY spectrum of compound **1** in acetone- $d_6$

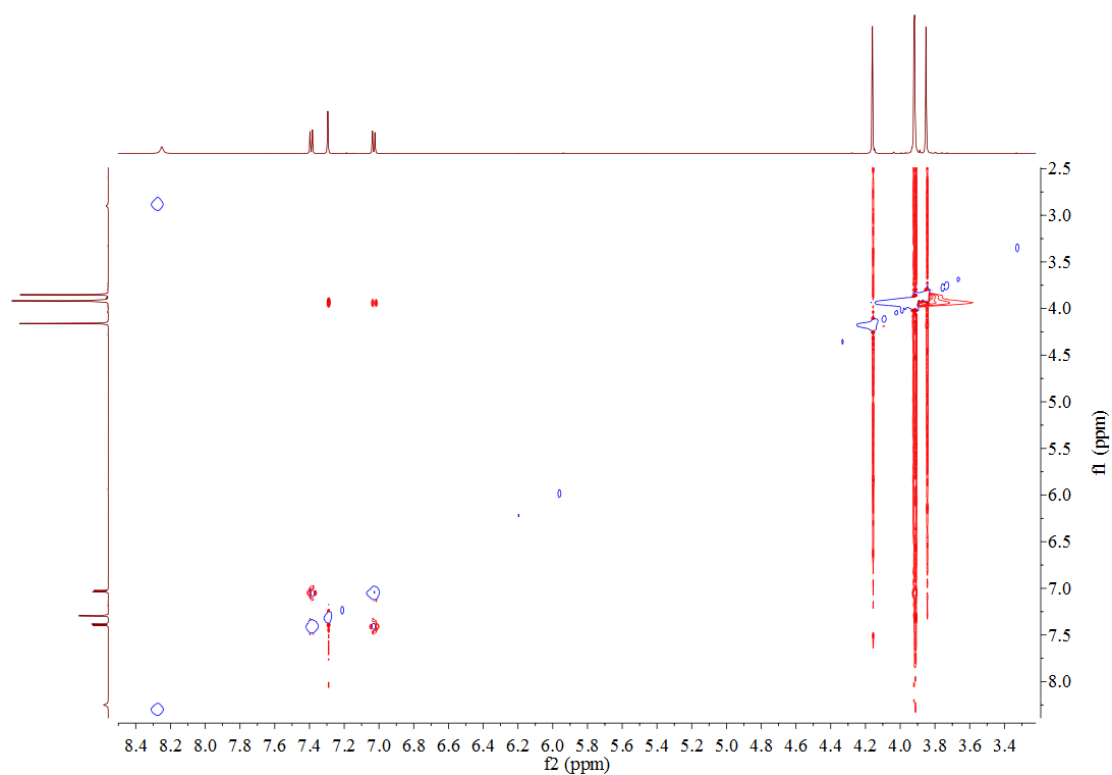

Figure S10. Key COSY, HMBC and NOESY correlations of compound **2**

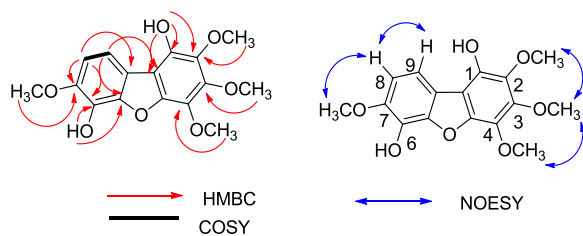



Figure S11. IR spectrum of compound **2**

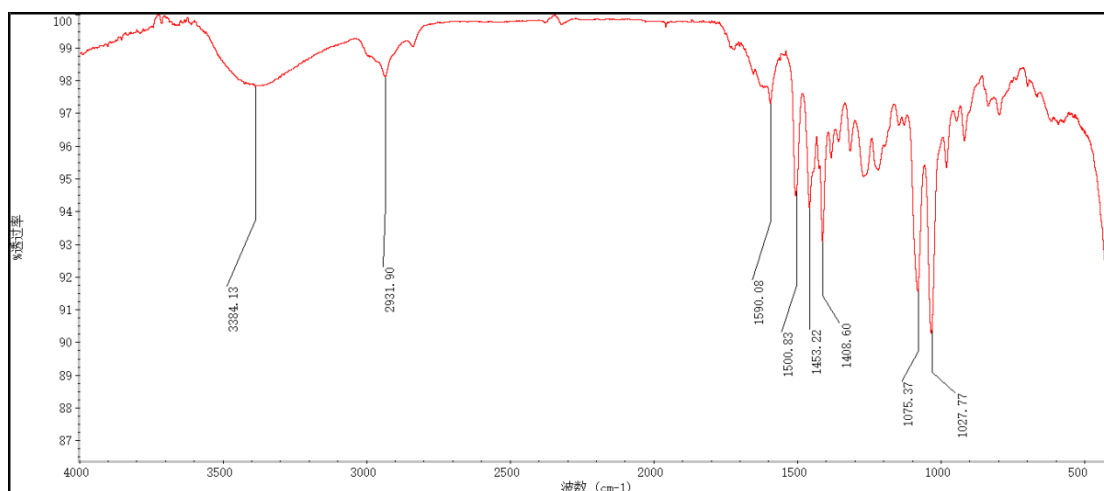

Figure S12. HRESIMS spectrum of compound **2**

### User Spectra

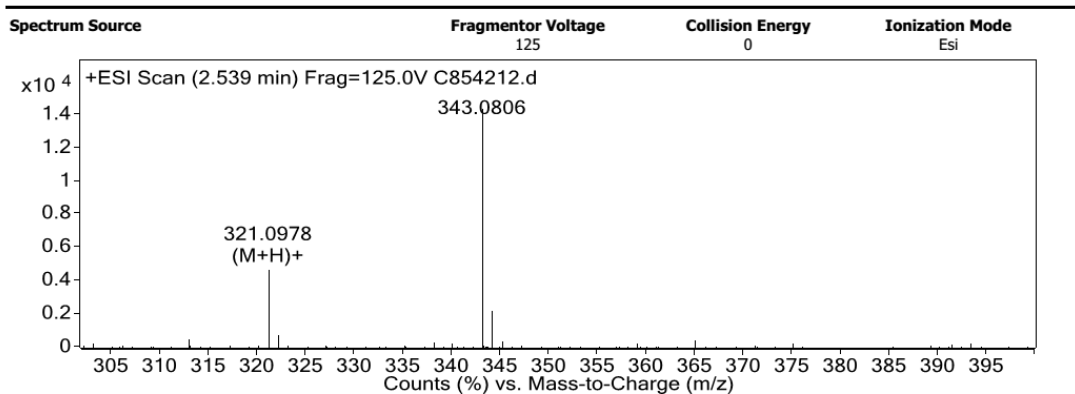

### Peak List

| m/z      | z | Abund  | Name | Formula    | Ion    | Score (DB) | Hits (DB) |
|----------|---|--------|------|------------|--------|------------|-----------|
| 116.9853 |   | 26893  |      |            |        |            |           |
| 157.0841 |   | 63870  |      |            |        |            |           |
| 301.1417 |   | 34792  |      |            |        |            |           |
| 321.0978 | 1 | 167569 |      | C16 H17 O7 | (M+H)+ |            |           |
| 322.0999 | 1 | 27353  |      | C16 H17 O7 | (M+H)+ |            |           |
| 343.0806 | 1 | 506686 |      |            |        |            |           |
| 344.0829 | 1 | 79211  |      |            |        |            |           |
| 405.0509 |   | 52608  |      |            |        |            |           |
| 413.2662 |   | 28481  |      |            |        |            |           |
| 663.1696 |   | 48171  |      |            |        |            |           |

### Formula Calculator Element Limits

| Element | Min | Max |
|---------|-----|-----|
| C       | 1   | 50  |
| H       | 0   | 100 |
| O       | 0   | 10  |
| N       | 0   | 0   |
| S       | 0   | 0   |
| Cl      | 0   | 0   |

### Formula Calculator Results

| Formula    | Best | Mass     | Tgt Mass | Diff (ppm) | Ion Species | Score |
|------------|------|----------|----------|------------|-------------|-------|
| C16 H16 O7 | TRUE | 320.0905 | 320.0896 | -2.7       | C16 H17 O7  | 80.73 |

Figure S13.  $^1\text{H}$  NMR spectrum of compound **2** in acetone- $d_6$

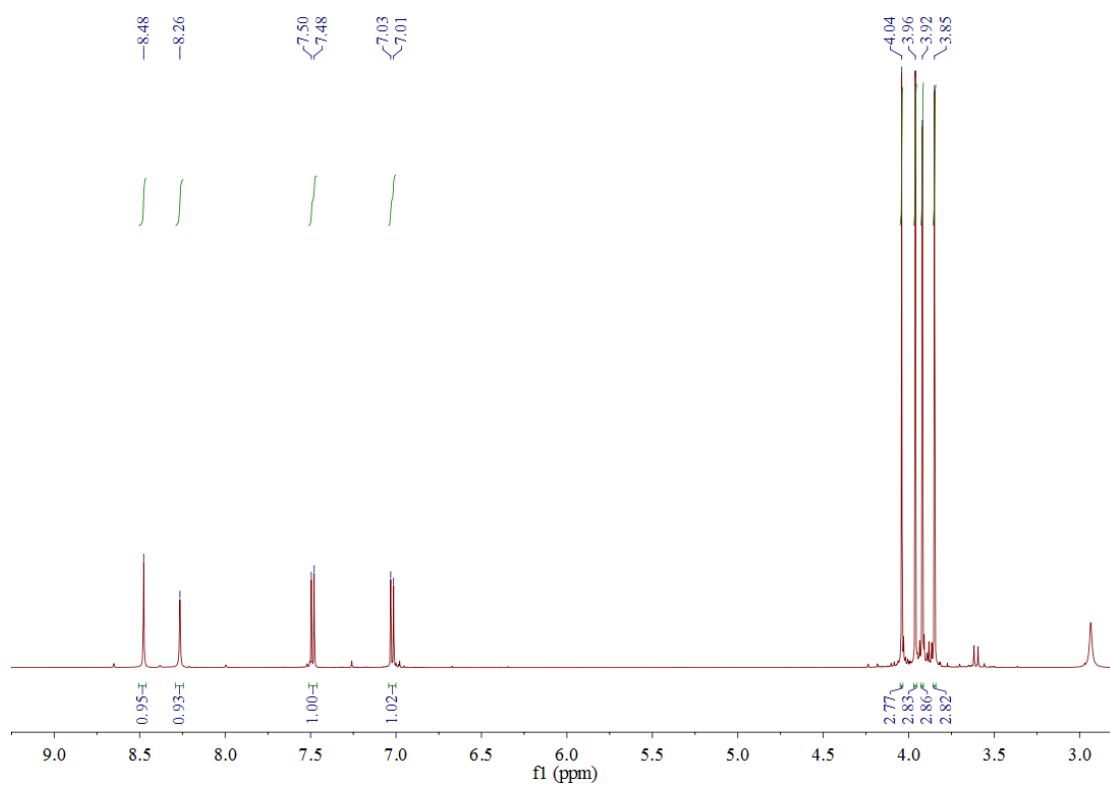

Figure S14.  $^{13}\text{C}$  NMR spectrum of compound **2** in acetone- $d_6$

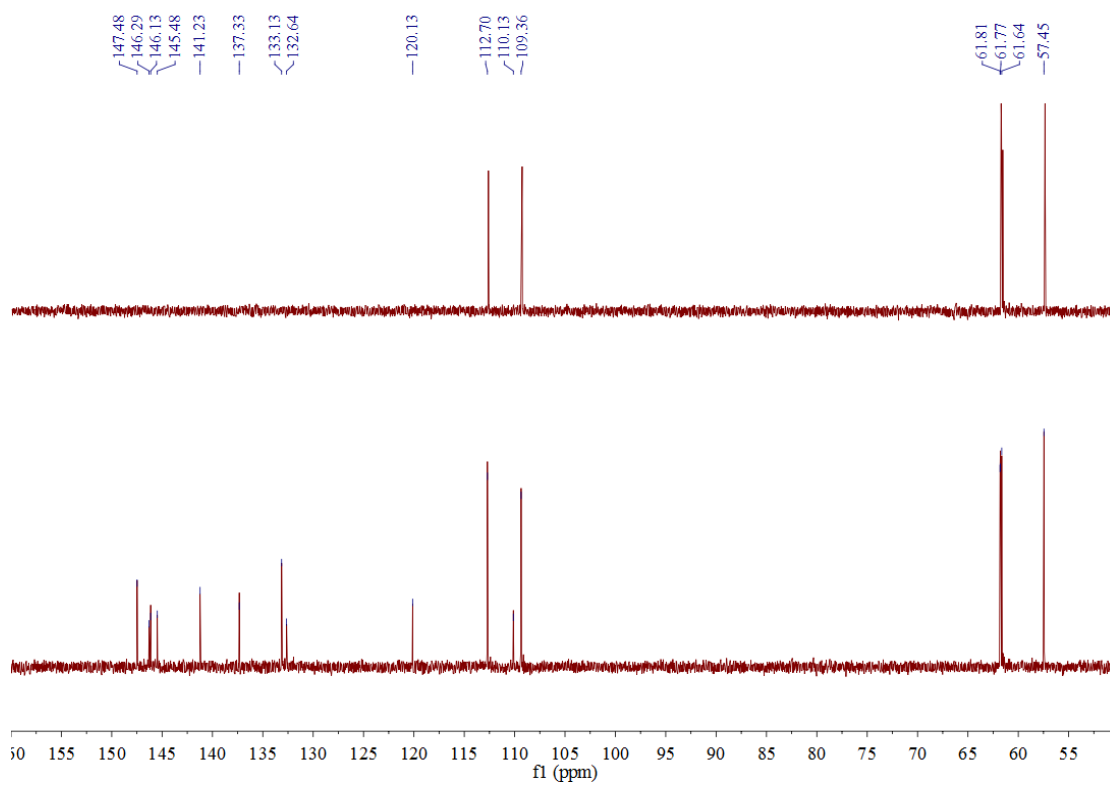

Figure S15. HSQC spectrum of compound **2** in acetone- $d_6$

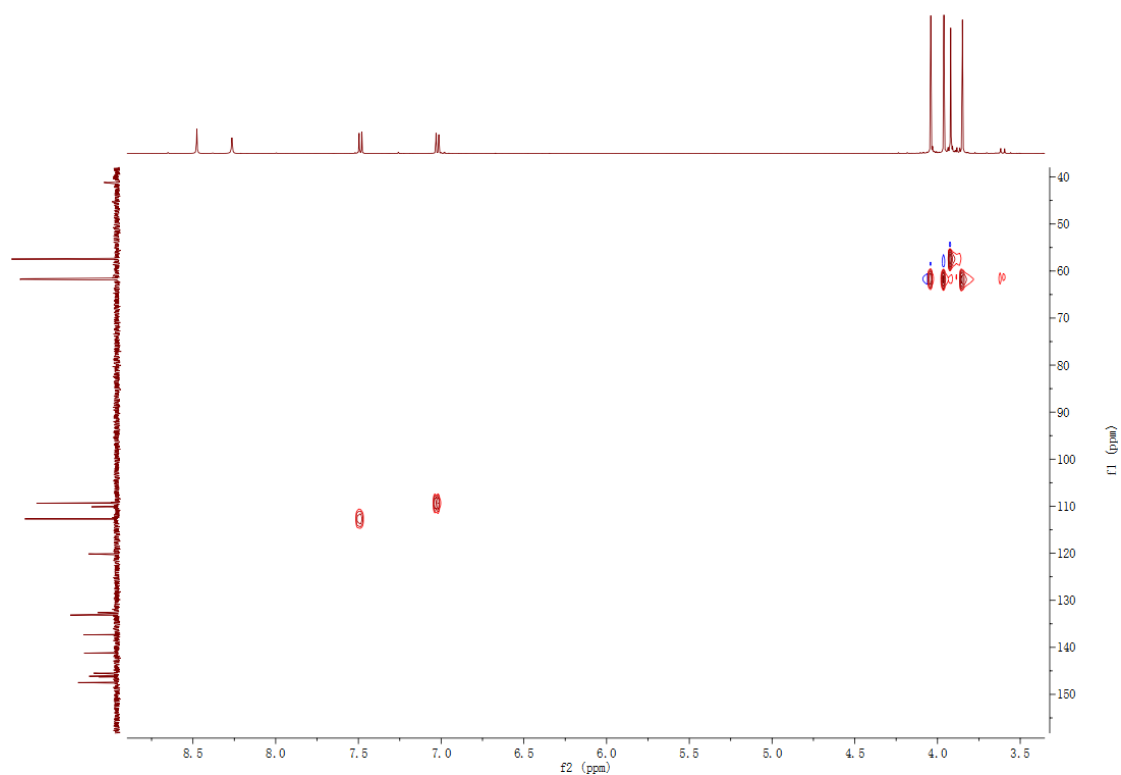

Figure S16. HMBC spectrum of compound **2** in acetone- $d_6$

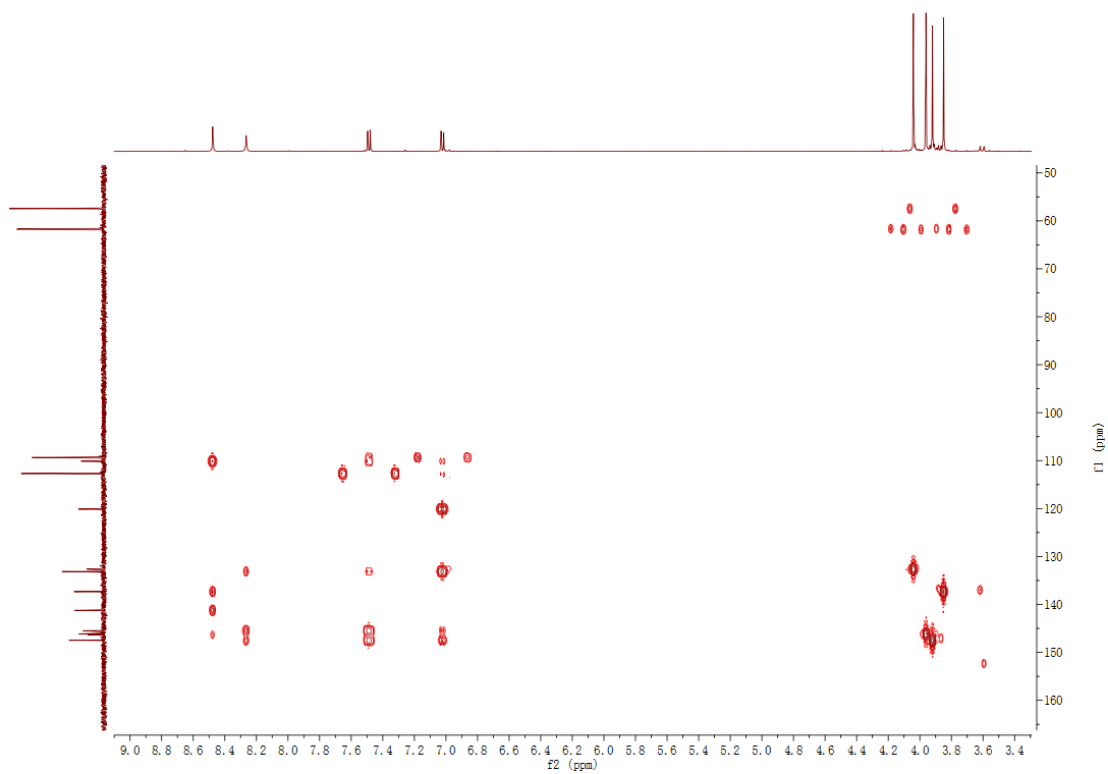

Figure S17. NOESY spectrum of compound **2** in acetone- $d_6$

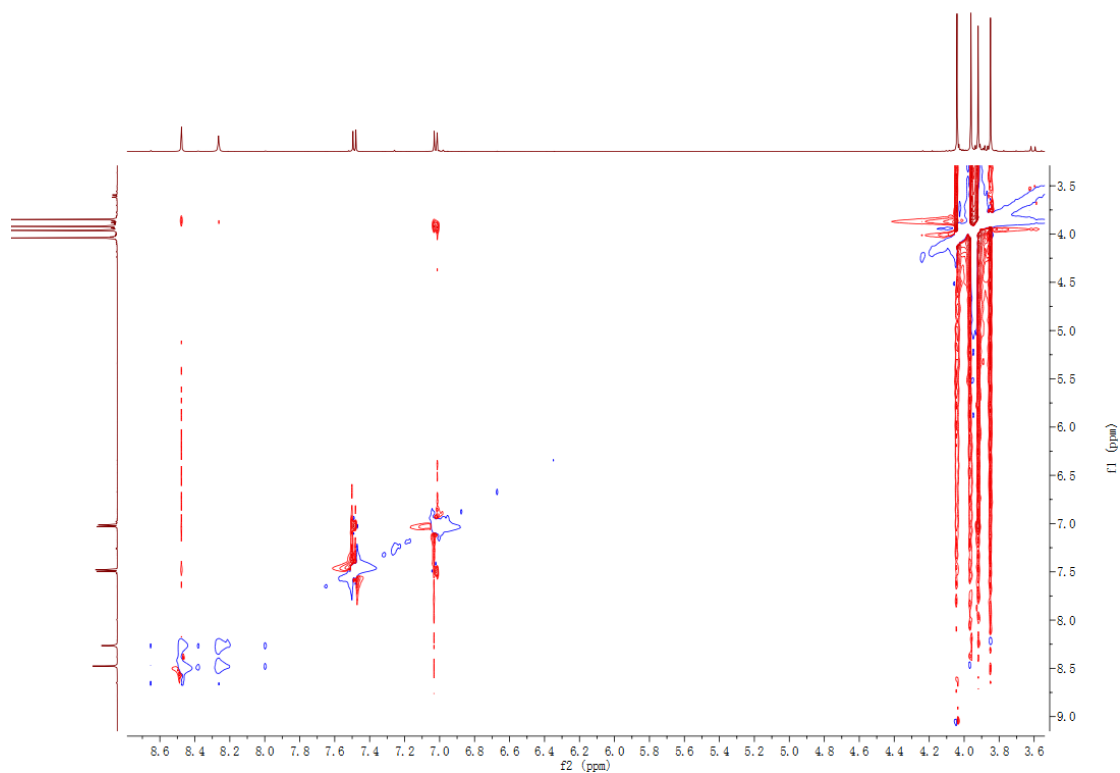

Figure S18. X-ray ORTEP drawing of compound **2**

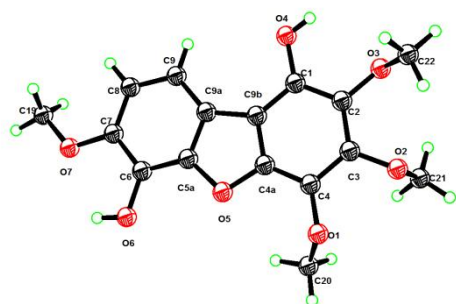

Figure S19. Key COSY, HMBC and NOESY correlations of compound **3**

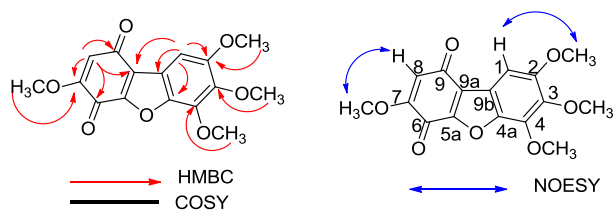

Figure S20. IR spectrum of compound **3**

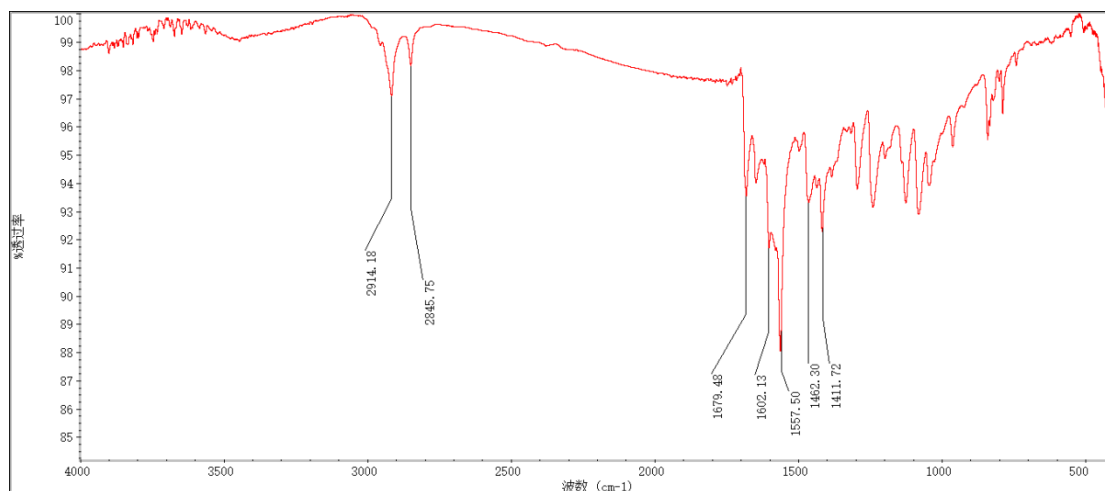

Figure S21. HRESIMS spectrum of compound **3**

#### User Spectra

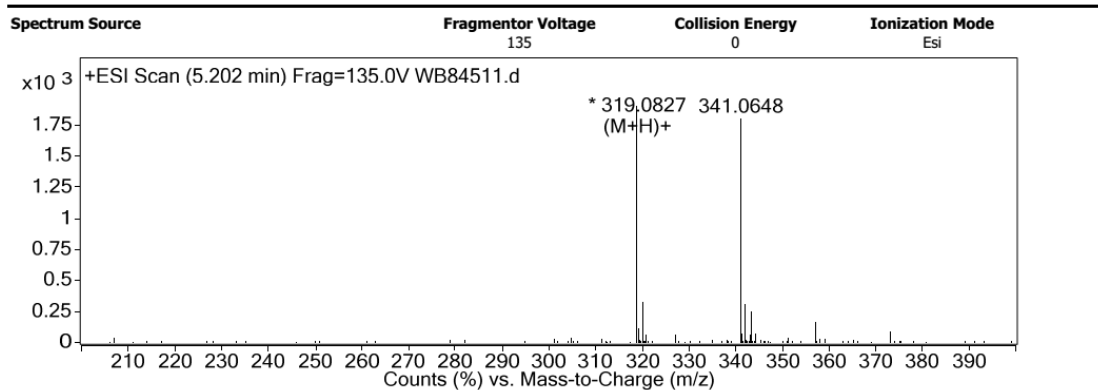

#### Peak List

| m/z      | z | Abund   | Name | Formula    | Ion    | Score (DB) | Hits (DB) |
|----------|---|---------|------|------------|--------|------------|-----------|
| 319.0827 | 1 | 990922  |      | C16 H15 O7 | (M+H)+ |            |           |
| 320.0847 | 1 | 172971  |      | C16 H15 O7 | (M+H)+ |            |           |
| 341.0648 | 1 | 939085  |      |            |        |            |           |
| 342.067  | 1 | 159917  |      |            |        |            |           |
| 343.339  |   | 127237  |      |            |        |            |           |
| 645.1565 |   | 98942   |      |            |        |            |           |
| 659.1439 | 1 | 1855270 |      |            |        |            |           |
| 659.4182 |   | 110320  |      |            |        |            |           |
| 660.1416 | 1 | 904572  |      |            |        |            |           |
| 661.1427 | 1 | 245423  |      |            |        |            |           |

#### Formula Calculator Element Limits

| Element | Min | Max |
|---------|-----|-----|
| C       | 1   | 50  |
| H       | 0   | 100 |
| O       | 0   | 10  |
| N       | 0   | 0   |
| S       | 0   | 0   |
| Cl      | 0   | 0   |

#### Formula Calculator Results

| Formula    | Best | Mass     | Tgt Mass | Diff (ppm) | Ion Species | Score |
|------------|------|----------|----------|------------|-------------|-------|
| C16 H14 O7 | TRUE | 318.0754 | 318.074  | -4.61      | C16 H15 O7  | 90.99 |

Figure S22.  $^1\text{H}$  NMR spectrum of compound **3** in  $\text{CDCl}_3$

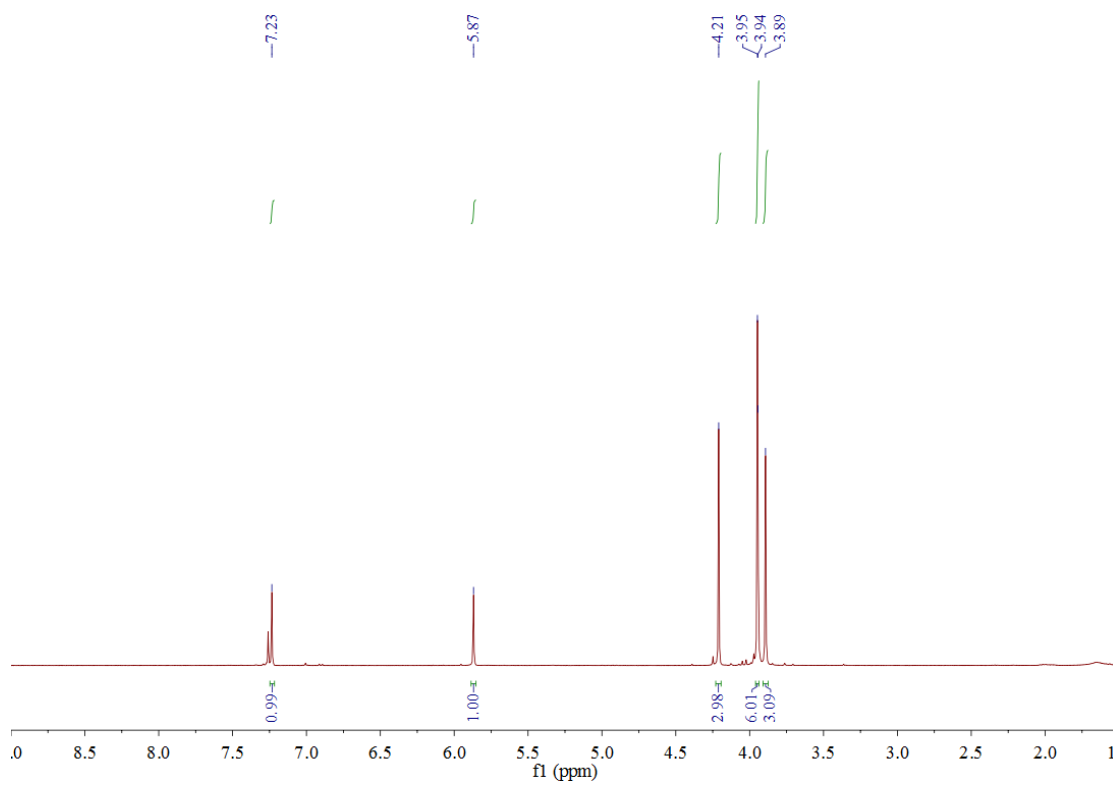

Figure S23.  $^{13}\text{C}$  NMR spectrum of compound **3** in  $\text{CDCl}_3$

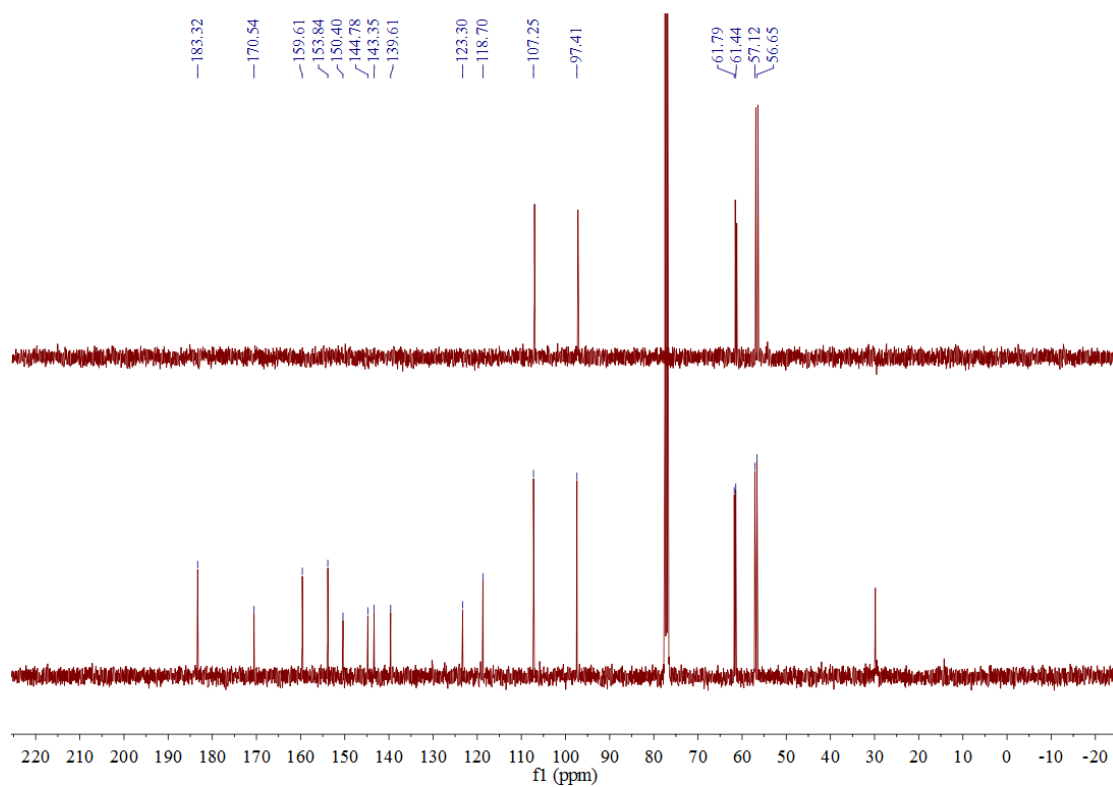

Figure S24. HSQC spectrum of compound **3** in CDCl<sub>3</sub>

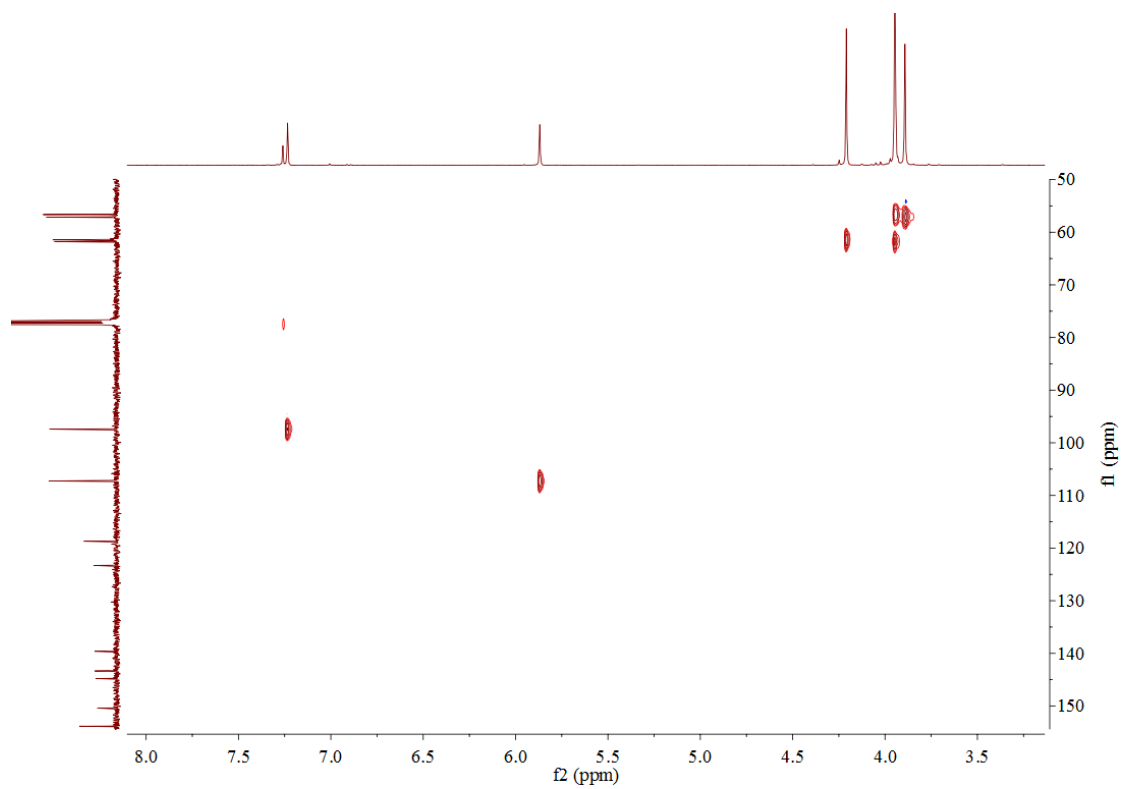

Figure S25. HMBC spectrum of compound **3** in CDCl<sub>3</sub>

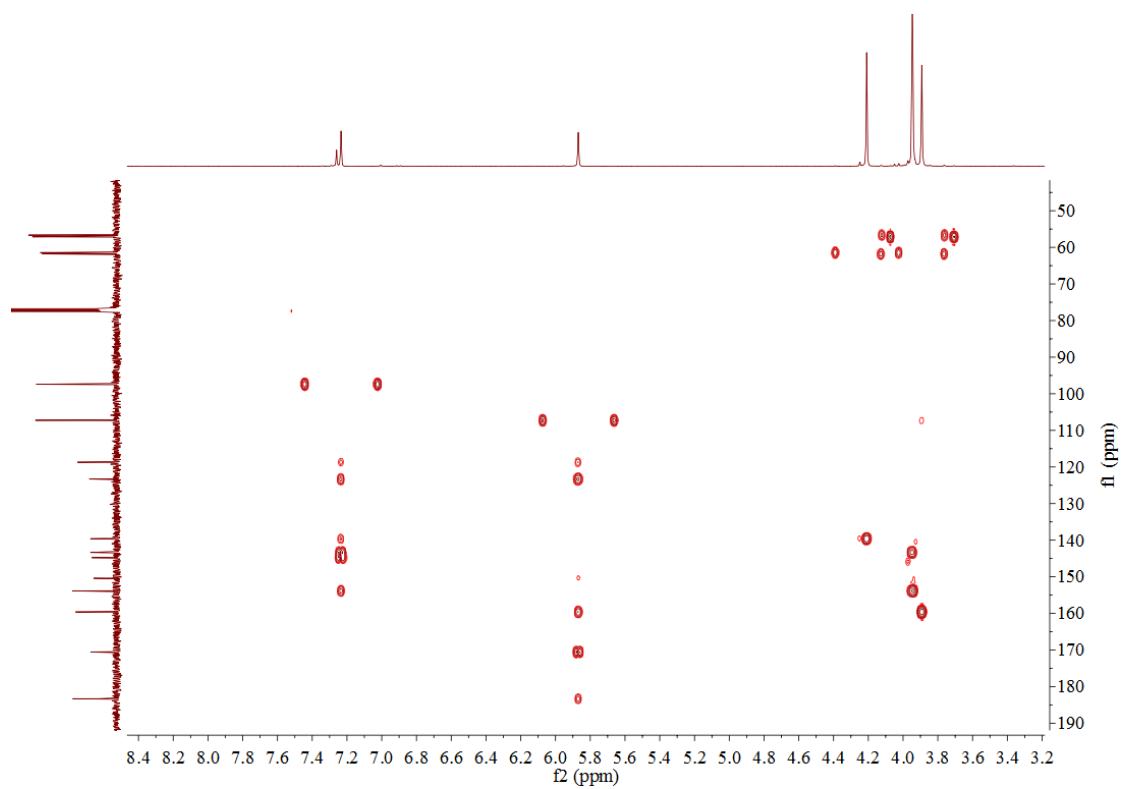

Figure S26. NOESY spectrum of compound **3** in CDCl<sub>3</sub>

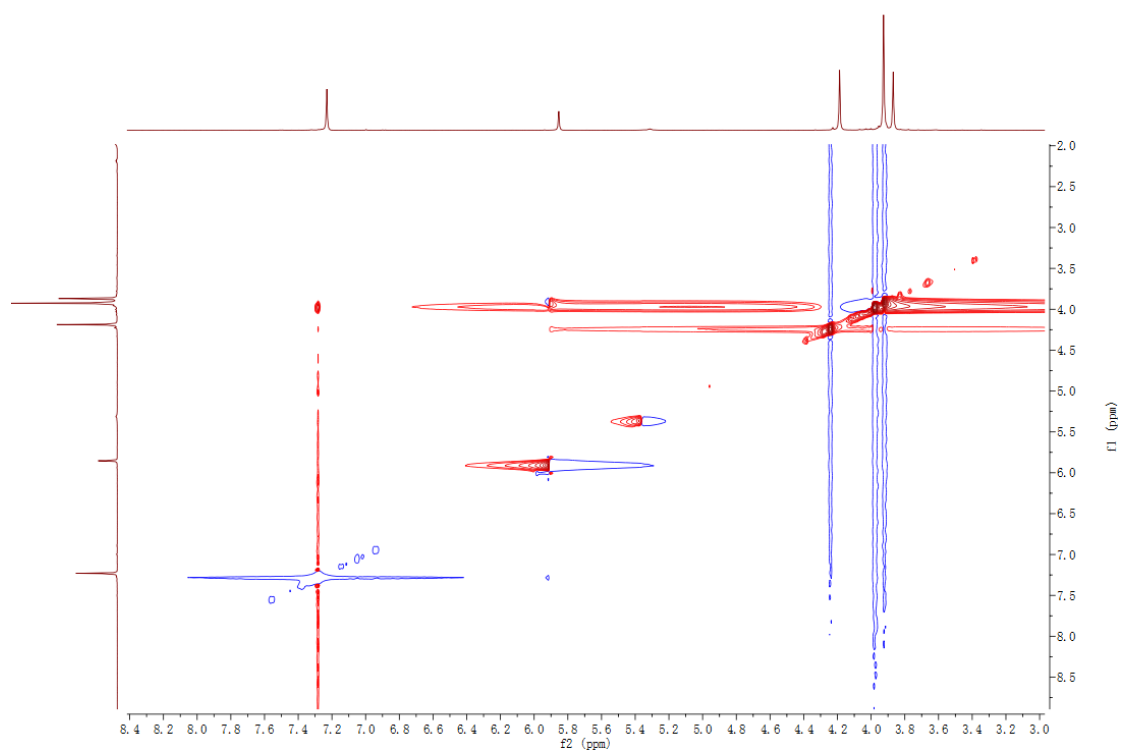

Figure S27. UV spectrum of compound **1**

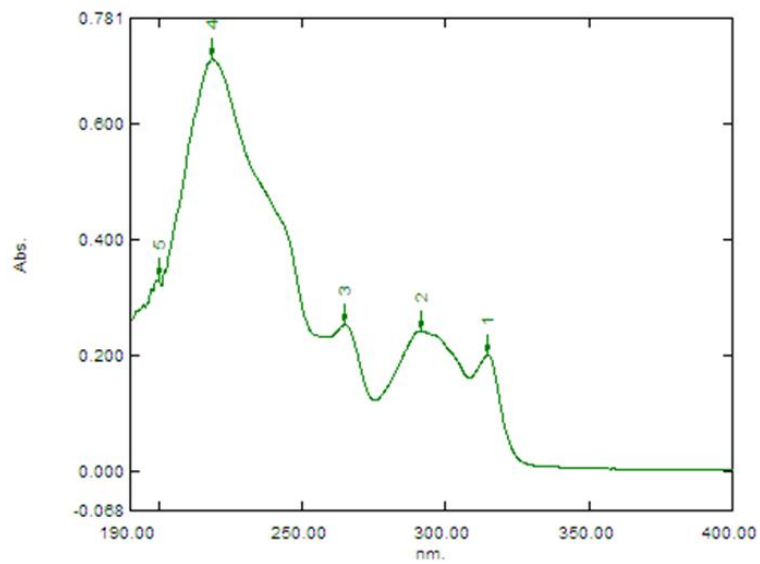



Figure S28. UV spectrum of compound **2**

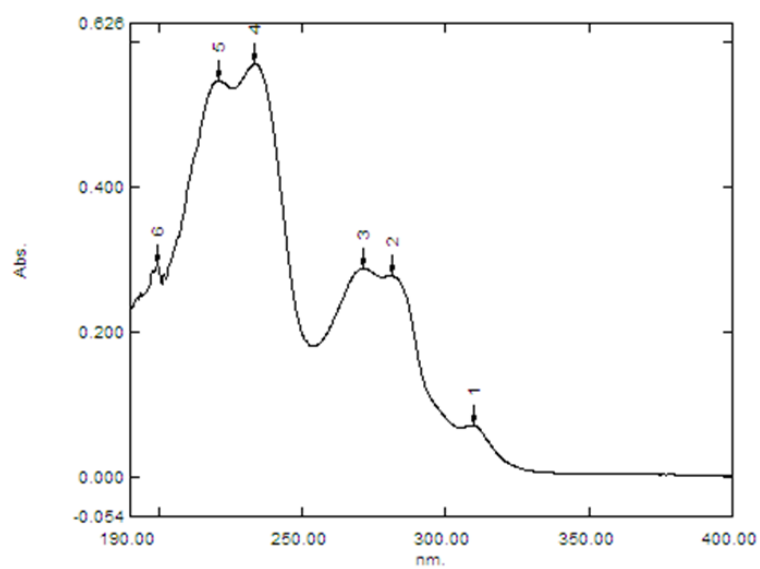

Figure S29. UV spectrum of compound **3**

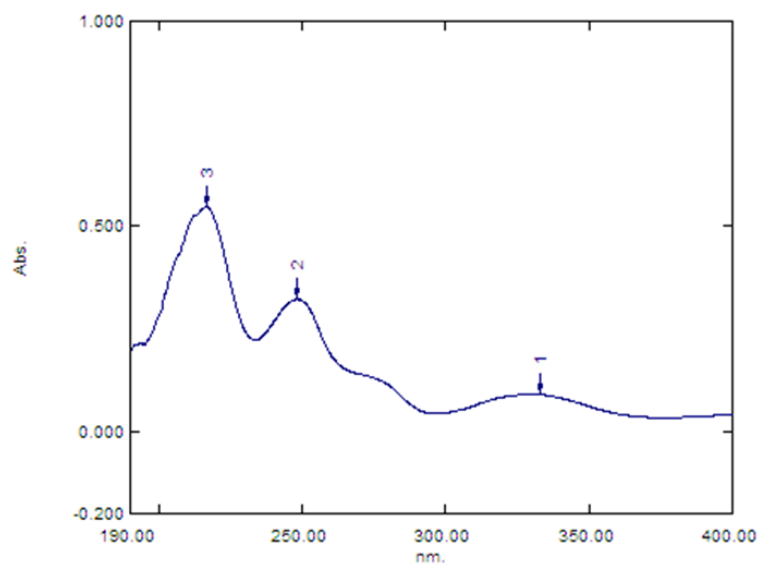

Supplement: Supplementary file 1 [file 14079818]
